# Supplementary material for: Soil Deposition of Atmospheric Hydrogen Constrained using Planetary Scale Observations
Source: Copernicus journal article supplement (doi:10.5194/egusphere-2024-3247), 2024-11-14
Supplement: Supplementary file [file egusphere-2024-3247-CC1-supplement.pdf]

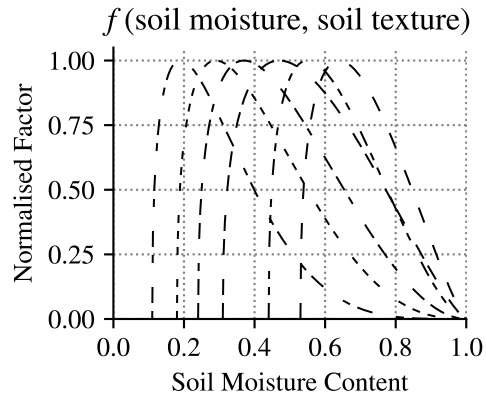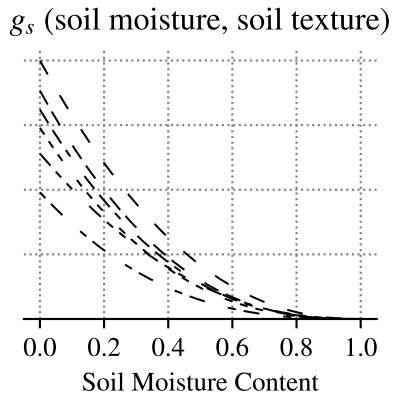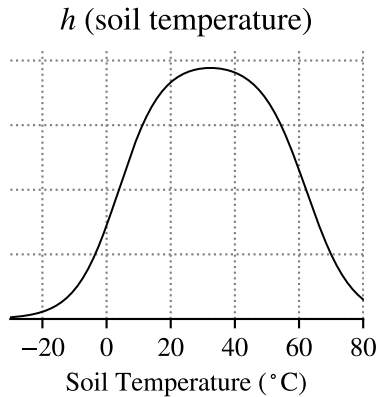

-- coarse  
--- medium

-- medium fine  
--- fine

-- very fine  
--- (tropical) organic
